# Supplementary material for: BRD4 modulates vulnerability of triple-negative breast cancer to targeting of integrin-dependent signaling pathways
Source: PubMed Central journal article supplement (PMC7716866; doi:10.1007/s13402-020-00537-1), 2020-10-02

# Figure S4

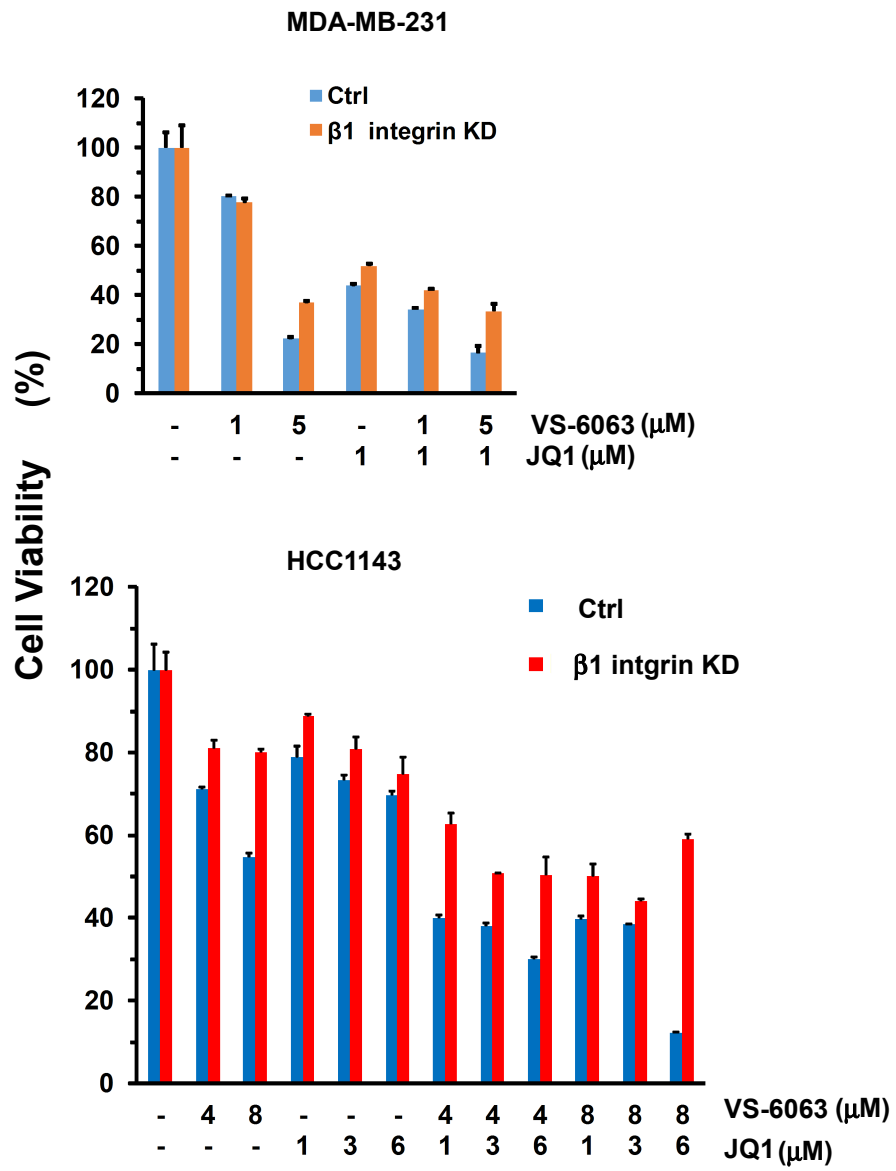

Supplement: 13402_2020_537_MOESM4_ESM.pdf [file 13402_2020_537_MOESM4_ESM.pdf]
