# Supplementary material for: BRD4 modulates vulnerability of triple-negative breast cancer to targeting of integrin-dependent signaling pathways
Source: PubMed Central journal article supplement (PMC7716866; doi:10.1007/s13402-020-00537-1), 2020-10-02
Supplement: 13402_2020_537_MOESM6_ESM.pdf [file 13402_2020_537_MOESM6_ESM.pdf]

**Supplementary Table S1. Sources and sequences of siRNA oligos and gRNA**

| <b>SiRNA/gRNA</b> | <b>Sequence</b>             | <b>Vendor</b> |
|-------------------|-----------------------------|---------------|
| BRD4              | On-target plus – SMART pool | Dharmacon     |
|                   |                             |               |
| Bim               | GACCGAGAAGGUAGACAAUUG       | CST*          |
|                   | CCAACAGGAACUAUGACCUCGACUA   | Genepharma    |
|                   |                             |               |
| FAK               | On-target plus – SMART pool | Dharmacon     |
|                   |                             |               |
| Myc               | On-target plus – SMART pool | Dharmacon     |
|                   | GAGGACUUGUUGCGGAACTT        | CST           |
|                   |                             |               |
| E-Cadherin        | On-target plus – SMART pool | Dharmacon     |
|                   |                             |               |
| $\beta$ -catenin  | GCACAAGAAUGGAUCACAATT       | CST           |
| $\beta$ -catenin  | GCUGAAACAUGCAGUUGUATT       | CST           |
|                   |                             |               |
| p65/RelA          | On-target plus – SMART pool | Dharmacon     |
|                   |                             |               |
| Snail             | GGCACGTACCAGTGTGGGTC        |               |
| Slug              | ATCTCTGGTTGTGGTATGAC        |               |

\*: CST: Cell Signaling Technology
