# Supplementary material for: BRD4 modulates vulnerability of triple-negative breast cancer to targeting of integrin-dependent signaling pathways
Source: PubMed Central journal article supplement (PMC7716866; doi:10.1007/s13402-020-00537-1), 2020-10-02
Supplement: 13402_2020_537_MOESM7_ESM.pdf [file 13402_2020_537_MOESM7_ESM.pdf]

**Table S2.**

| <b>Tumor subtype</b><br>(No. patient)                             | <b>Cohort</b><br>(N=817)        | <b>Her2</b><br>(N=120)       | <b>Basal</b><br>(N=107)       | <b>Luminal A</b><br>(N=201)   | <b>Luminal B</b><br>(N=122)  |
|-------------------------------------------------------------------|---------------------------------|------------------------------|-------------------------------|-------------------------------|------------------------------|
| <b>No. of tumors with amplification (%)</b><br>(FAK vs c-Myc)     | 129 (15.79)<br>vs<br>173 (21.2) | 27 (22.5)<br>vs<br>38 (31.7) | 32 (29.9)<br>vs<br>51 (47.7)  | 21 (10.5)<br>vs<br>26 (12.94) | 33 (27.1)<br>vs<br>39 (32.0) |
| <b>Spearman correlation</b>                                       | 0.73**                          | 0.58*                        | 0.68*                         | 0.79**                        | 0.77**                       |
| <i>p</i> value                                                    | <0.0001                         | <0.0001                      | <0.0001                       | <0.0001                       | <0.0001                      |
| <b>No. of tumors with mRNA upregulation (%)</b><br>(FAK vs c-Myc) | 306 (37.5)<br>vs.<br>53 (6.5)   | 49 (40.8)<br>vs.<br>5 (4.2)  | 62 (57.9)<br>vs.<br>24 (22.4) | 62 (30.9)<br>vs.<br>1 (0.5)   | 70 (57.4)<br>vs.<br>4 (3.3)  |
| <b>Spearman correlation</b>                                       | 0.073                           | -0.0035                      | 0.14                          | 0.11                          | 0.065                        |
| <i>p</i> value                                                    | 0.036                           | 0.974                        | 0.15                          | 0.13                          | 0.47                         |

\*\* : A strong correlation.

\* : Intermediate correlation.
