# Supplementary material for: BRD4 modulates vulnerability of triple-negative breast cancer to targeting of integrin-dependent signaling pathways
Source: PubMed Central journal article supplement (PMC7716866; doi:10.1007/s13402-020-00537-1), 2020-10-02
Supplement: 13402_2020_537_MOESM8_ESM.pdf [file 13402_2020_537_MOESM8_ESM.pdf]

Table S3.

| TNBC Cell Line | Gene Amplification |     |       | Oncogenic Activation/Mutation |         |          |
|----------------|--------------------|-----|-------|-------------------------------|---------|----------|
|                | 8q24 region        | FAK | c-Myc | BRCA1/2                       | Ras/Raf | PI3K/Akt |
| HCC1143        | √                  | √   | √     | √                             |         |          |
| HCC1937        | √                  | ?   |       | √                             |         | √        |
| HCC38          |                    |     |       |                               |         |          |
| HS578T         |                    |     | √     |                               | √       |          |
| HCC1806        | √                  | √   | √     | √                             |         |          |
| HCC1395        | √                  | √   | √     | √                             |         |          |
| SUM149         | √                  |     |       | √                             |         |          |
| SUM1315        |                    |     | √     | √                             |         |          |
| MDA-MB-157     |                    |     |       |                               |         |          |
| SUM159         | √                  |     |       |                               | √       | √        |
| MDA-MB-436     | √                  |     |       | √                             |         |          |
| MDA-MB-231     |                    |     |       |                               | √       |          |
| BT549          | √                  | √   | √     |                               |         | √        |
| 4T1            | ?                  | √   | √     | ?                             | ?       | ?        |

√: Being positive.

+: Indicate expression abundance or inhibitor effectiveness.
